# Supplementary material for: Efficient generation of Knock-in/Knock-out marmoset embryo via CRISPR/Cas9 gene editing
Source: PubMed Central journal article supplement (PMC6722079; doi:10.1038/s41598-019-49110-3), 2019-09-03
Supplement: 41598_2019_49110_MOESM1_ESM.pdf [file 41598_2019_49110_MOESM1_ESM.pdf]

## Supplementary Information

### Title

“Efficient generation of Knock-in/Knock-out marmoset embryo via CRISPR/Cas9 gene editing.”

### Authors

Wakako Kumita<sup>1</sup>, Kenya Sato<sup>1</sup>, Yasuhiro Suzuki<sup>1</sup>, Yoko Kurotaki<sup>1</sup>, Takeshi Harada<sup>2, 3</sup>, Yang Zhou<sup>4</sup>, Noriyuki Kishi<sup>5</sup>, Kengo Sato<sup>6</sup>, Atsu Aiba<sup>3</sup>, Yasubumi Sakakibara<sup>6</sup>,

Guoping Feng<sup>4</sup>, Hideyuki Okano<sup>5, 7, 8</sup> and Erika Sasaki<sup>1, 5, 8\*</sup>

<sup>1</sup>Central Institute for Experimental Animals, Kawasaki-shi, Kanagawa, 210-0821, Japan.

<sup>2</sup>Department of Molecular Biology and Biochemistry, Graduate School of Medicine, Osaka University, Suita-shi, Osaka, 565-0871, Japan

<sup>3</sup>Laboratory of Animal Resources, Center for Disease Biology and Integrative Medicine, Graduate School of Medicine, The University of Tokyo, Hongo, Bunkyo-ku, Tokyo, 113-8655, Japan

<sup>4</sup>McGovern Institute for Brain Research, Department of Brain and Cognitive Sciences, Massachusetts Institute of Technology, Cambridge, Massachusetts, 02139, USA

<sup>5</sup>Laboratory for Marmoset Neural Architecture, RIKEN Center for Brain Science, Wako-shi, Saitama, 351-0198, Japan

<sup>6</sup>Department of Biosciences and Informatics, Keio University, Yokohama-shi, Kanagawa, 223-8522, Japan

<sup>7</sup>Department of Physiology, Keio University School of Medicine, Shinjuku-ku, Tokyo, 160-8582, Japan

<sup>8</sup>Advanced Research Center, Keio University, Shinjuku-ku, Tokyo 160-8582, Japan

\*Corresponding author

e-mail and telephone: esasaki@cica.or.jp, +81-44-201-8545

**Supplementary Table 1. Sequence of sgRNAs**

| Target        | Location/Gene ID                                 | sgRNA | 5'-sequence-3'       | PAM | strand |
|---------------|--------------------------------------------------|-------|----------------------|-----|--------|
| <i>c-kit</i>  | Chr.3: 138848396-138932796<br>Gene ID: 100411615 | W37-1 | ACTTCCTTATGATCACAAAT | GGG | +      |
|               |                                                  | W37-2 | AATGGGAGTTTCCCAGAAAC | AGG | +      |
|               |                                                  | W37-3 | AACTTCCTTATGATCACAAA | TGG | +      |
|               |                                                  | W37-4 | GATCATAAGGAAGTTGTGTT | GGG | -      |
| <i>Shank3</i> | Chr.1: 210201841-210277470<br>Gene ID: 100405926 | Shk-A | GGGGCCGAAGAGGAGCGCCC | GGG | +      |
|               |                                                  | Shk-B | GGGCTCCTGCCCGTTGCTGG | TGG | -      |
|               |                                                  | Shk-C | AGAGGAGCGCCCGGGCACCC | CGG | +      |

**Supplementary Table 2. Primers for PCR and sequence analysis**

| Target        | Use                         | Primer   | 5'-sequence-3'                | Product size (bp) |
|---------------|-----------------------------|----------|-------------------------------|-------------------|
| <i>c-kit</i>  | 1st PCR                     | forward  | TGGAATTGCGGGGCTATGGCAG        | 745               |
|               |                             | reverse  | AACCTTCCCAAAGCACCAGC          |                   |
|               | 2nd PCR / sequence analysis | forward* | AAATCCAGCCCCACACCCTGTTCA      | 454               |
|               |                             | reverse  | ATCAGAGGAGGTGCAATTTACAGA      |                   |
| <i>Shank3</i> | 1st PCR                     | forward  | TCGACGAGCGCCTCTTGGGCACC       | 735               |
|               |                             | reverse  | CCCTGGTCTCCTCATCGCTA          |                   |
|               | 2nd PCR / sequence analysis | forward* | TGTGGATGTGCAGGCCCGGGACCCAGAGC | 392               |
|               |                             | reverse  | CTGGCTCTCCTCTGAGCTGCCCTGACCTG |                   |

\*Forward primers of 2<sup>nd</sup> PCR were used for sequence analysis in each target gene.

**Supplementary Table 3. PCR conditions**

| Target        | Use             | Reaction temperatures and cycles |                   |              |
|---------------|-----------------|----------------------------------|-------------------|--------------|
| <i>c-kit</i>  | 1st and 2nd PCR | Pre-denaturation:                | 94°C, 2 min       |              |
|               |                 | Denaturation:                    | 98°C, 10 sec      |              |
|               |                 | Extension:                       | 74°C, 30 sec      |              |
|               |                 |                                  | 5 cycles          |              |
|               |                 | Denaturation:                    | 98°C, 10 sec      |              |
|               |                 | Extension:                       | 72°C, 30 sec      |              |
|               |                 |                                  | 5 cycles          |              |
|               |                 | Denaturation:                    | 98°C, 10 sec      |              |
|               |                 | Extension:                       | 70°C, 30 sec      |              |
|               | 5 cycles        |                                  |                   |              |
|               |                 | Denaturation:                    | 98°C, 10 sec      |              |
|               |                 | Extension:                       | 68°C, 30 sec      |              |
|               |                 |                                  | 28 cycles         |              |
|               |                 | Extension:                       | 68°C, 7 min       |              |
| <i>Shank3</i> | 1st PCR         | Pre-denaturation:                | 94°C, 2 min       |              |
|               |                 | Denaturation:                    | 98°C, 10 sec      |              |
|               |                 | Extension:                       | 74°C, 30 sec      |              |
|               |                 |                                  | 5 cycles          |              |
|               |                 | Denaturation:                    | 98°C, 10 sec      |              |
|               |                 | Extension:                       | 72°C, 30 sec      |              |
|               |                 |                                  | 5 cycles          |              |
|               |                 | Denaturation:                    | 98°C, 10 sec      |              |
|               |                 | Extension:                       | 70°C, 30 sec      |              |
|               |                 | 5 cycles                         |                   |              |
|               |                 |                                  | Denaturation:     | 98°C, 10 sec |
|               |                 |                                  | Extension:        | 68°C, 30 sec |
|               |                 |                                  |                   | 45 cycles    |
|               |                 |                                  | Extension:        | 68°C, 7 min  |
|               |                 | 2nd PCR                          | Pre-denaturation: | 94°C, 2 min  |
|               | Denaturation:   |                                  | 98°C, 10 sec      |              |
|               | Extension:      |                                  | 74°C, 30 sec      |              |
|               |                 |                                  | 5 cycles          |              |
|               | Denaturation:   |                                  | 98°C, 10 sec      |              |
|               | Extension:      |                                  | 72°C, 30 sec      |              |
|               |                 | 5 cycles                         |                   |              |
|               |                 | Denaturation:                    | 98°C, 10 sec      |              |
|               |                 | Extension:                       | 70°C, 30 sec      |              |
|               |                 |                                  | 5 cycles          |              |
|               |                 | Denaturation:                    | 98°C, 10 sec      |              |
|               |                 | Extension:                       | 68°C, 30 sec      |              |
|               |                 |                                  | 40 cycles         |              |
|               |                 | Extension:                       | 68°C, 7 min       |              |

**Supplementary Table 4. Sub-cloning analysis of CRISPR/Cas9-mediated *c-kit* gene modification in marmoset fibroblast cells**

| sgRNA                  | Sequence                                                                        | No. of sub-clones |          |       | Modified sequence |
|------------------------|---------------------------------------------------------------------------------|-------------------|----------|-------|-------------------|
|                        |                                                                                 | Intact            | Modified | Total |                   |
| <i>Intact sequence</i> | CCCAACACA <u>ACTTCCTTATGATCACAAATGG<b>GAG</b>TTTCCCAGAAACAGGCTGAGTTTTGG</u>     |                   |          |       |                   |
| W37-1                  | CCCAACACA <u>ACTTCCTTATGATCACAAA<b>A</b>TGGGAGTTTCCCAGAAACAGGCTGAGTTTTGG</u>    |                   | 2        | 20    | +1bp              |
|                        | CCCAACACA <u>ACTTCCTTATGATC-CAATGGGAGTTTCCCAGAAACAGGCTGAGTTTTGG</u>             |                   | 1        |       | -1bp              |
|                        | CCCAACACA <u>ACTTCCTT-----ATGGGAGTTTCCCAGAAACAGGCTGAGTTTTGG</u>                 |                   | 1        |       | -10bp             |
|                        | CCCAACACA <u>ACTTCCTTATGATCACAAATGGGAGTTTCCCAGAAACAGGCTGAGTTTTGG</u>            | 16                |          |       | Intact            |
|                        | Total (%)                                                                       | 16 (80)           | 4 (20)   |       |                   |
| W37-2                  | CCCAACACA <u>ACTTCCTTATGATCACAAATGGGAGTTTCCC--AAACAGGCTGAGTTTTGG</u>            |                   | 1        | 19    | -2bp              |
|                        | CCCAACACA <u>ACTTCCTTATGATCACAAATGGGAGTTTCCCAGAA-CAGGCTGAGTTTTGG</u>            |                   | 2        |       | -1bp              |
|                        | CCCAACACA <u>ACTTCCTTATGATCACAAATGGGAGTTTCCC-----GGCTGAGTTTTGG</u>              |                   | 1        |       | -7bp              |
|                        | CCCAACACA <u>ACTTCCTTATGATCACAAATGGGAGTTT-----AACAGGCTGAGTTTTGG</u>             |                   | 1        |       | -6bp              |
|                        | CCCAACACA <u>ACTTCCTTATGATCACAAATGGGAGTTTCCCAGAAACAGGCTGAGTTTTGG</u>            | 14                |          |       | Intact            |
| Total (%)              | 14 (73.7)                                                                       | 5 (26.3)          |          |       |                   |
| W37-3                  | CCCAACACA <u>ACTTCCTTATGA-----AGGCTGAGTTTTGG</u>                                |                   | 1        | 20    | -25bp             |
|                        | CCCAACACA <u>ACTTCCTTATGATCACAAA<b>A</b>TGGGAGTTTCCCAGAAACAGGCTGAGTTTTGG</u>    |                   | 1        |       | +1bp              |
|                        | CCCAACACA <u>ACTTCCTTATGATCACAAATGGGAGTTTCCCAGAAACAGGCTGAGTTTTGG</u>            | 18                |          |       | Intact            |
|                        | Total (%)                                                                       | 18 (90)           | 2 (10)   |       |                   |
| W37-4                  | CCC <b>A</b> AACACA <u>ACTTCCTTATGATCACAAATGGGAGTTTCCCAGAAACAGGCTGAGTTTTGG</u>  |                   | 1        | 20    | +1bp              |
|                        | CCC <b>AA</b> AACACA <u>ACTTCCTTATGATCACAAATGGGAGTTTCCCAGAAACAGGCTGAGTTTTGG</u> |                   | 1        |       | +2bp              |
|                        | CCC----- <u>ACA</u> ACTTCCTTATGATCACAAATGGGAGTTTCCCAGAAACAGGCTGAGTTTTGG         |                   | 1        |       | -4bp              |
|                        | CCCAACACA <u>ACTTCCTTATGATCACAAATGGGAGTTTCCCAGAAACAGGCTGAGTTTTGG</u>            | 17                |          |       | Intact            |
|                        | Total (%)                                                                       | 17 (85)           | 3 (15)   |       |                   |

Bold letters showed E579 at *c-kit* gene exon11. Underlines indicated each sgRNA sequence, and red letters indicated insertion/deletion modification of target gene.

**Supplementary Table 5. Sub-cloning analysis of CRISPR/Cas9-mediated *Shank3* gene modification in marmoset fibroblast cells**

| sgRNA                  | Sequence                                                                            | No. of sub-clones |          |       | Modified sequence |
|------------------------|-------------------------------------------------------------------------------------|-------------------|----------|-------|-------------------|
|                        |                                                                                     | Intact            | Modified | Total |                   |
| <i>Intact sequence</i> | GCCACCAGCAACGGGCAGGAGCCCAGCAGGCTGGGG <b>GCC</b> GAAGAGGAGCGCCCGGGCACCCCGGAGTT       |                   |          |       |                   |
| Shk-A                  | GCCACCAGCAACGGGCAGGAGCCCAGCAGGCTGGGG <b>C</b> GAAGAGGAGCGCCCGGGCACCCCGGAGTT         |                   | 1        | 20    | C>G               |
|                        | GCCACCAGCAACGGGCAGGAGCCCAGCAGGCTGGGG <b>CC</b> GAAGACGAGCGCC-----TCTT               |                   | 1        |       | -14bp, +2bp       |
|                        | GCCACCAGCAACGGGCAGGAGCCCAGCAGGCTGGGG <b>CC</b> GAAGAGGAGCGCCCGGGCACCCCGGAGTT        | 18                |          |       | Intact            |
|                        | Total (%)                                                                           | 18 (90)           | 2 (10)   |       |                   |
| Shk-B                  | GCCACCAGCAACGGGCAGGAGCCCAGCAGGCTGGGG <b>CC</b> GAAGAGGAGCGCCCGGGCACCCCGGAGTT        | 20                |          | 20    | Intact            |
|                        | Total (%)                                                                           | 20 (100)          | 0 (0)    |       |                   |
| Shk-C                  | GCCACCAGCAACGGGCAGGAGCCCAGCAGGCTGGGG <b>CC</b> GAAGAGGAGCGCCCGGGCA <b>AGGGGAATG</b> |                   | 1        | 20    | replacement       |
|                        | GCCACCAGCAACGGGCAGGAGCCCAGCAGGCTGGGG <b>CC</b> GAAGAGGAGCGCCCGGGCACCCCGGAGTT        | 19                |          |       |                   |
|                        | Total (%)                                                                           | 19 (95)           | 1 (5)    |       |                   |

Bold letters showed *Shank3* gene A1227. Underlines indicated each sgRNA sequence, and red letters indicated insertion/deletion modification of target gene.

**Supplementary Table 6. Efficiency of CRISPR/Cas9 activity in marmoset embryos**

| Target        | Injected materials | Injected | Development |         |                   | Analyzed | Modified (%) ** |
|---------------|--------------------|----------|-------------|---------|-------------------|----------|-----------------|
|               |                    |          | Dead        | 1-7cell | 8cell-Blast (%) * |          |                 |
| <i>c-kit</i>  | mRNA               | 20       | 4           | 7       | 9 (45)            | 9        | 7 (77.8)        |
|               | nuclease           | 25       | 5           | 5       | 15 (60)           | 9        | 9 (100)         |
| <i>Shank3</i> | mRNA               | 22       | 8           | 8       | 6 (27.3)          | 5        | 4 (80)          |
|               | nuclease           | 26       | 5           | 7       | 14 (53.8)         | 12       | 12 (100)        |

\*Developmental stage of *in vitro* cultured embryos at Day11 after injection, and the efficiencies were calculated from the number of injected embryos.

\*\*Calculated from analyzed embryos.

**Supplementary Table 7. Sub-cloning analysis of CRISPR/Cas9-mediated *c-kit* gene modification in marmoset embryos**

| Injected materials     | Embryo no. | Sequence                                                                   | No. of sub-clones |           |           |           | Modified sequence |
|------------------------|------------|----------------------------------------------------------------------------|-------------------|-----------|-----------|-----------|-------------------|
|                        |            |                                                                            | Intact            | Ins       | Del       | Total     |                   |
| <i>Intact sequence</i> |            | CCAACACA <u>ACTTCCTTATGATCACAAATGG<b>GAG</b>TTTCCCAGAAACAGGCTGAGTTTTGG</u> |                   |           |           |           |                   |
| mRNA                   | Embryo 1   | CCAACACA <u>ACTTCCTTATGATCACAA--TGGGAGTTTCCCAGAAACAGGCTGAGTTTTGG</u>       |                   |           | 4         | 13        | -2bp              |
|                        |            | CCAACACA <u>ACTTCCTTATGATCACAA-TGGGAGTTTCCCAGAAACAGGCTGAGTTTTGG</u>        |                   |           | 3         |           | -1bp              |
|                        |            | CCAACACA <u>ACTTCCTTATGATCACAAATGGGAGTTTCCCAGAAACAGGCTGAGTTTTGG</u>        | 6                 |           |           |           |                   |
|                        | Embryo 2   | CCAACACA <u>ACTTCCTTATGATCACAAATGGGAGTTTCCCA<b>AAA</b>CAGGCTGAGTTTTGG</u>  |                   | 3         |           | 12        | +1bp              |
|                        |            | CCAACACA <u>ACTTCCTTATGATCACAAA<b>AAAA</b>TGGGAGTTTCCCAGAAACAGGCTGAGTT</u> |                   | 6         |           |           | +4bp              |
|                        |            | CCAACACA <u>ACTTCCTTATGATCACAAATGGGAGTTTCCCAGAAACAGGCTGAGTTTTGG</u>        | 3                 |           |           |           |                   |
|                        | Embryo 3   | CCAACACA <u>ACTTCCTTATGATCACAAATGGGAGTTT<b>ACA</b>-----GGCTGAGTTTTGG</u>   |                   |           | 14        | 20        | C>A, -6bp         |
|                        |            | CCAACACA <u>ACTTCCTTATGATCACAAATGGGAGTTTCCCAGAAACAGGCTGAGTTTTGG</u>        | 6                 |           |           |           |                   |
|                        | Total (%)  |                                                                            |                   | 15 (33.3) | 9 (20.0)  | 21 (46.7) | 45                |
| nuclease               | Embryo 1   | CCAACACA <u>ACTTCCTTATGATCACAAA<b>AAA</b>TGGGAGTTTCCCAGAAACAGGCTGAGTTT</u> |                   | 7         |           | 13        | +3bp              |
|                        |            | CCACACA <u>ACTTCCTTA-----TGGGAGTTTCCCAGAAACAGGCTGAGTTTTGG</u>              |                   |           | 4         |           | -10bp             |
|                        |            | CCAACACA <u>ACTTCCTTATGATCACAAA<b>A</b>TGGGAGTTTCCCAGAAACAGGCTGAGTTTTG</u> |                   | 2         |           |           | +1bp              |
|                        | Embryo 2   | CCAACACA <u>ACTTCCTTATGATCACAA--TGGGAGTTTCCCAGAAACAGGCTGAGTTTTGG</u>       |                   |           | 3         | 15        | -2bp              |
|                        |            | CCAACACA <u>ACTTCCTTATGATCACAA-TGGGAGTTTCCCAGAAACAGGCTGAGTTTTGG</u>        |                   |           | 5         |           | -1bp              |
|                        |            | CCAACACA <u>ACTTCCTTATGATCACAAA<b>AA</b>TGGGAGTTTCCCAGAAACAGGCTGAGTTTT</u> |                   | 4         |           |           | +2bp              |
|                        |            | CCAACACA <u>ACTTCCTTATGATCACAAATGGGAGTTTCCCAGAAACAGGCTGAGTTTTGG</u>        | 3                 |           |           |           |                   |
|                        | Embryo 3   | CCAACACA <u>ACTTCCTTATGATCACAAA<b>A</b>TGGGAGTTTCCCAGAAACAGGCTGAGTTTTG</u> |                   | 11        |           | 21        | +1bp              |
|                        |            | CCAACACA <u>ACTTCCTTATGATCACAA-TGGGAGTTTCCCAGAAACAGGCTGAGTTTTGG</u>        |                   |           | 10        |           | -1bp              |
|                        | Total (%)  |                                                                            |                   | 3 (6.1)   | 24 (49.0) | 22 (44.9) | 49                |

Underlines indicated W37-1 sgRNA sequence. Bold letters showed E579 at *c-kit* gene exon11, and red letters indicated insertion/deletion modification of the target gene. Ins; insertion modification, Del; deletion modification.



**Supplementary Table 8. Sub-cloning analysis of CRISPR/Cas9-mediated *Shank3* gene modification in marmoset embryos**

| Injected materials     | Embryo no. | Sequence                                                                               | No. of sub-clones |       |           |       | Modified sequence |              |
|------------------------|------------|----------------------------------------------------------------------------------------|-------------------|-------|-----------|-------|-------------------|--------------|
|                        |            |                                                                                        | Intact            | Ins   | Del       | Total |                   |              |
| <i>Intact sequence</i> |            | CCCAGCAGGCTGGGGG <b>CC</b> GAAGAGGAGCGCCCGGGCACC <b>CC</b> GGAGTTGGCCCCGGCCCCC         |                   |       |           |       |                   |              |
| mRNA                   | Embryo 1   | CCCAGCAGGCTGGGGG <b>CC</b> GAAGAGGAG-----TTGGCCCCGGCCCCC                               |                   |       | 14        | 16    | -18bp             |              |
|                        |            | CCCAGCAGGCTGGGGG <b>CC</b> GAAGAGGAGCGCCCGGGCACC <b>CC</b> GGAGTTGGCCCCGGCCCCC         | 2                 |       |           |       |                   |              |
|                        | Embryo 2   | CCCAGCAGGCTGGGGG <b>C</b> -----ACCCCGGAGTTGGCCCCGGCCCCC                                |                   |       | 9         | 12    | -19bp             |              |
|                        |            | CCCAGCAGGCTGGGGG <b>CC</b> GAAGAGGAG--CCC <b>GG</b> CACC <b>CC</b> GGAGTTGGCCCCGGCCCCC |                   |       | 3         |       |                   | -2bp         |
|                        | Embryo 3   | CCC-----GGAGTTGGCCCCGGCCCCC                                                            |                   |       | 8         | 15    | -38bp             |              |
|                        |            | CCCAGCAGGCTGGGGG <b>CC</b> GAAGAGGAGCGCCCGGGCACC <b>CC</b> GGAGTTGGCCCCGGCCCCC         | 7                 |       |           |       |                   |              |
|                        |            | Total (%)                                                                              | 9 (20.9)          | 0 (0) | 34 (79.1) | 43    |                   |              |
| nuclease               | Embryo 1   | CCCAGCAGGCTGGG-----CACCCCGGAGTTGGCCCCGGCCCCC                                           |                   |       | 9         | 19    | -21bp             |              |
|                        |            | CCCAGCAGGCTGGGGG <b>CCG</b> -----CGCCCGGGCACC <b>CC</b> GGAGTTGGCCCCGGCCCCC            |                   |       | 10        |       |                   | -8bp         |
|                        | Embryo 2   | CCCAGCAGGCTGGGGG <b>CC</b> GAAGAGGAGCG-----GGCACCCCGGAGTTGGCCCCGGCCCCC                 |                   |       | 8         | 13    | -4bp              |              |
|                        |            | CCGGTGTCTGCTCTGAAGCCATTGGTC-453 <b>del</b> -TGAAGACC <b>CC</b> GGAGTTGGCCCCGGCC        |                   |       | 3*        |       |                   | -453bp, +5bp |
|                        |            | CCCAGCAGGCTGGGGG <b>CC</b> GAAGAGGAGCGCCCGGGCACC <b>CC</b> GGAGTTGGCCCCGGCCCCC         | 2                 |       |           |       |                   |              |
|                        | Embryo 3   | CCCAGCAGG <b>C</b> -----ACCCCGGAGTTGGCCCCGGCCCCC                                       |                   |       | 18        | 18    | -26bp             |              |
|                        |            | Total (%)                                                                              | 2 (4.0)           | 0 (0) | 48 (96.0) | 45    |                   |              |

Underlines indicated Shk-A sgRNA sequence. Bold letters showed *Shank3* gene 1227 alanine, and red letters indicated insertion/deletion modification of the target gene. Ins; insertion modification, Del; deletion modification.

\* Modified sequence of large deletion containing small insertions was classified as "deletion" mutations in this table.

**Supplementary Table 9. Mosaicism estimation of CRISPR/Cas9 injected embryos by blastomere analysis**

| Target        | Injected materials | Embryo | No. of blastomere | No. of blastomere (%) |           |             | % of average of modified blastomere | % of completely modified embryo |
|---------------|--------------------|--------|-------------------|-----------------------|-----------|-------------|-------------------------------------|---------------------------------|
|               |                    |        |                   | Intact                | Modified  |             |                                     |                                 |
|               |                    |        |                   |                       | Bi-allele | Mono-allele |                                     |                                 |
| <i>c-kit</i>  | mRNA               | 1      | 10                | 6 (60)                | 2 (20)    | 2 (20)      | 50.0                                | 0                               |
|               |                    | 2      | 10                | 3 (30)                | 4 (40)    | 3 (30)      |                                     |                                 |
|               |                    | 3      | 8                 | 6 (75)                | 2 (25)    | 0 (0)       |                                     |                                 |
|               |                    | 4      | 8                 | 2 (25)                | 5 (62.5)  | 1 (12.5)    |                                     |                                 |
|               |                    | 5      | 5                 | 3 (60)                | 2 (40)    | 0 (0)       |                                     |                                 |
|               |                    | Total  | 41                | 20 (48.8)             | 15 (36.6) | 6 (14.6)    |                                     |                                 |
|               | nuclease           | 1      | 12                | 3 (25)                | 9 (75)    | 0 (0)       | 83.6                                | 60                              |
|               |                    | 2      | 8                 | 0 (0)                 | 8 (100)   | 0 (0)       |                                     |                                 |
|               |                    | 3      | 7                 | 4 (57.1)              | 3 (42.9)  | 0 (0)       |                                     |                                 |
|               |                    | 4      | 7                 | 0 (0)                 | 7 (100)   | 0 (0)       |                                     |                                 |
|               |                    | 5      | 6                 | 0 (0)                 | 6 (100)   | 0 (0)       |                                     |                                 |
| Total         |                    | 40     | 7 (17.5)          | 33 (82.5)             | 0 (0)     |             |                                     |                                 |
| <i>Shank3</i> | mRNA               | 1      | 9                 | 3 (33.3)              | 6 (66.7)  | 0 (0)       | 56.3                                | 20                              |
|               |                    | 2      | 8                 | 2 (25)                | 5 (62.5)  | 1 (12.5)    |                                     |                                 |
|               |                    | 3      | 8                 | 8 (100)               | 0 (0)     | 0 (0)       |                                     |                                 |
|               |                    | 4      | 4                 | 2 (50)                | 2 (50)    | 0 (0)       |                                     |                                 |
|               |                    | 5      | 4                 | 0 (0)                 | 2 (50)    | 2 (50)      |                                     |                                 |
|               |                    | Total  | 33                | 15 (45.5)             | 15 (45.5) | 1 (9.1)     |                                     |                                 |
|               | nuclease           | 1      | 8                 | 0 (0)                 | 8 (100)   | 0 (0)       | 90.0                                | 80                              |
|               |                    | 2      | 8                 | 4 (50)                | 4 (50)    | 0 (0)       |                                     |                                 |
|               |                    | 3      | 6                 | 0 (0)                 | 6 (100)   | 0 (0)       |                                     |                                 |
|               |                    | 4      | 5                 | 0 (0)                 | 5 (100)   | 0 (0)       |                                     |                                 |
|               |                    | 5      | 5                 | 0 (0)                 | 5 (100)   | 0 (0)       |                                     |                                 |
| Total         |                    | 32     | 4 (12.5)          | 28 (87.5)             | 0 (0)     |             |                                     |                                 |

**Supplementary Table 10. Blastomeres analysis of CRISPR/Cas9 injected embryos targeting *c-kit* gene**

| Injected materials                                                    | Embryo no. | Sequence                                                                                                                                                                              | No. of blastomere                                                     |          |        | Modified sequence            |
|-----------------------------------------------------------------------|------------|---------------------------------------------------------------------------------------------------------------------------------------------------------------------------------------|-----------------------------------------------------------------------|----------|--------|------------------------------|
|                                                                       |            |                                                                                                                                                                                       | Intact                                                                | Modified | Total  |                              |
| <i>Intact sequence</i>                                                |            | CCCAACACA <u>ACTTCCTTATGATCACAAATGGGAG</u> TTTCCCAGAAACAGGCTGAGTTTTGG                                                                                                                 |                                                                       |          |        |                              |
| mRNA                                                                  | Embryo 1   | CCCAACACA <u>ACTTCCTTATGATCACAAATGGGAG</u> TTTCCCAGAAACAGGCTGAGTTTTGG                                                                                                                 |                                                                       | 2        | 10     | Intact / -17bp               |
|                                                                       |            | CCCAACACA <u>ACTTCCTGTTTCCACAAA</u> -----CAGGCTGAGTTTTGG                                                                                                                              |                                                                       |          |        | +1bp                         |
|                                                                       |            | CCCAACACA <u>ACTTCCTTATGATCACAAATGGGAG</u> TTTCCCAGAAACAGGCTGAGTTTTGG                                                                                                                 | 6                                                                     |          |        | Intact                       |
|                                                                       | Embryo 2   | CCCAACACA <u>ACTTCCTTATGATCACAAATGGGAG</u> TTTCCCAGAAACAGGCTGAGTTTTGG                                                                                                                 |                                                                       | 4        | 10     | -12bp / +1bp                 |
|                                                                       |            | CCCAACACA <u>ACTTCCTTATGAT</u> -----ATTCCCAGAAACAGGCTGAGTTTTGG                                                                                                                        |                                                                       |          |        | Intact / -2bp                |
|                                                                       |            | CCCAACACA <u>ACTTCCTTATGATCACA</u> --TGGGAGTTTCCCAGAAACAGGCTGAGTTTTGG                                                                                                                 | 3                                                                     |          |        | Intact                       |
|                                                                       | Embryo 3   | CCCAGACAAA <u>AGCT</u> -----GGCTGATTTTTGG                                                                                                                                             |                                                                       | 2        | 8      | -37bp, +4bp, G>T/ -41bp, 4bp |
|                                                                       |            | CCCAGAAACA-----GACAGAGTTTTGG                                                                                                                                                          | 6                                                                     |          |        | Intact                       |
|                                                                       | Embryo 4   | CCCAACACA <u>ACTTCCT</u> -----GTTTCCCAGAAACAGGCTGAGTTTTGG                                                                                                                             |                                                                       | 4        | 8      | -17bp                        |
|                                                                       |            | CCCAACACA <u>ACTTCCT</u> -----GTTTCCCAGAAACAGGCTGAGTTTTGG                                                                                                                             |                                                                       | 1        |        | Intact / -17bp               |
|                                                                       |            | CCCAACACA <u>ACTTCCTTATGATCACAAATGGGAG</u> TTTCCCAGAAACAGGCTGAGTTTTGG                                                                                                                 |                                                                       | 1        |        | -6bp, +10bp                  |
|                                                                       |            | CCCAACACA <u>ACTTCCTTATGATCACA</u> GGAAACAGGAAGTTTCCCAGAAACAGGCTGAGTT                                                                                                                 | 2                                                                     |          |        | Intact                       |
|                                                                       | Embryo 5   | CCCAACACA <u>ACTTCCTTATGATCATTATG</u> AAATGGGAGTTTCCCAGAAACAGGCTGAGTT                                                                                                                 |                                                                       | 2        | 5      | -1bp, +5bp                   |
|                                                                       |            | CCCAACACA <u>ACTTCCTTATGATCACAAATGGGAG</u> TTTCCCAGAAACAGGCTGAGTTTTGG                                                                                                                 | 3                                                                     |          |        | Intact                       |
|                                                                       | nuclease   | Embryo 1                                                                                                                                                                              | CCCAACACA <u>ACTTCCTTATGATCACA</u> --TGGGAGTTTCCCAGAAACAGGCTGAGTTTTGG |          | 6      | 12                           |
| CCCAACACA <u>ACTTCCTTATG</u> -----GGAGTTTCCCAGAAACAGGCTGAGTTTTGG      |            |                                                                                                                                                                                       |                                                                       | 3        | -10bp  |                              |
| CCCAACACA <u>ACTTCCTTATGATCACAAATGGGAG</u> TTTCCCAGAAACAGGCTGAGTTTTGG |            |                                                                                                                                                                                       | 3                                                                     |          | Intact |                              |
| Embryo 2                                                              |            | CCCAACACA <u>ACTTCCTTATGATCACA</u> TAATCATAAGGGATGTTTAAGTATGATACCAATC<br>AAATGGGAGTTTCCCAGAAACAGGCTGAGTTTTGG                                                                          |                                                                       | 4        | 8      | +36bp                        |
|                                                                       |            | CCCAACACA <u>ACTTCCTTATGATCACA</u> -ATGGGAGTTTCCCAGAAACAGGCTGAGTTTTGG<br>CCCAACACA <u>ACTTCCTTATGATCACA</u> TAATCATAAGGGATGTTTAAGTATGATACCAATC<br>AAATGGGAGTTTCCCAGAAACAGGCTGAGTTTTGG |                                                                       | 4        |        | -1bp / +36bp                 |
| Embryo 3*                                                             |            | CCCAACACA <u>ACTTCCTTATGATCACAAATGGGAG</u> TTTCA-----CAGGCTGAGTTTTGG                                                                                                                  |                                                                       | 3        | 7      | -6bp                         |
|                                                                       |            | CCCAACACA <u>ACTTCCTTATGATCACAAATGGGAG</u> TTTCCCAGAAACAGGCTGAGTTTTGG                                                                                                                 | 4                                                                     |          |        | Intact                       |
| Embryo 4                                                              |            | CCCAACACA <u>ACTTCCTTATGATCACAAA</u> AAATGGGAGTTTCCCAGAAACAGGCTGAGTTTTT                                                                                                               |                                                                       | 4        | 7      | +2bp / -2bp                  |
|                                                                       |            | CCCAACACA <u>ACTTCCTTATGATCA</u> -AATGGGAGTTTCCCAGAAACAGGCTGAGTTTTGG<br>CCCAACACA <u>ACTTCCTTATGATCACAAA</u> AAATGGGAGTTTCCCAGAAACAGGCTGAGTTTT                                        |                                                                       | 3        |        | +3bp                         |
| Embryo 5                                                              |            | CCCAACACA <u>ACTTCCTTATGATCACAAA</u> AAATGGGAGTTTCCCAGAAACAGGCTGAGTTTT                                                                                                                |                                                                       | 4        | 6      | +2bp                         |
|                                                                       |            | CCCAACACA <u>ACTTCCTTATGATCACA</u> A-TGGGAGTTTCCCAGAAACAGGCTGAGTTTTGG                                                                                                                 |                                                                       | 2        |        | -1bp                         |

Underlines indicated W37-1 sgRNA sequence. Bold letters showed E579 at *c-kit* gene exon11, and red letters indicated insertion/deletion modification of the target gene.

Heterozygotic mutation sequences were filled by gray. \*Correlate to Figure 3B.

**Supplementary Table 11. Blastomeres analysis of CRISPR/Cas9 injected embryos targeting *Shank3* gene**

| Injected materials                                          | Embryo no. | Sequence                                                                                  | No. of blastomere                                                                                                                        |          |       | Modified sequence        |             |
|-------------------------------------------------------------|------------|-------------------------------------------------------------------------------------------|------------------------------------------------------------------------------------------------------------------------------------------|----------|-------|--------------------------|-------------|
|                                                             |            |                                                                                           | Intact                                                                                                                                   | Modified | Total |                          |             |
| <i>Intact sequence</i>                                      |            | CCCAGCAGGCTGGGG <b>GCC</b> GAAGAGGAGCGCCCGGGCACCCCGGAGTTGGCCCCGGCCCC                      |                                                                                                                                          |          |       |                          |             |
| mRNA                                                        | Embryo 1   | CCCAGCAGGCTGGGGGCCGAAGAGGAGC-----GGGCACCCCGGAGTTGGCCCCGGCCCC                              |                                                                                                                                          | 4        | 9     | -4bp                     |             |
|                                                             |            | CCCAGCAGGCTGGGGGCCGAAGAGGAGC-CCCGGGCACCCCGGAGTTGGCCCCGGCCCC                               |                                                                                                                                          | 2        |       | -1bp                     |             |
|                                                             |            | CCCAGCAGGCTGGGGGCCGAAGAGGAGCGCCCGGGCACCCCGGAGTTGGCCCCGGCCCC                               | 3                                                                                                                                        |          |       | Intact                   |             |
|                                                             | Embryo 2   | CCCAGCAGGCTGGGGGCCGAAGAGG-----CACCCCGGAGTTGGCCCCGGCCCC                                    |                                                                                                                                          | 3        | 8     | -10bp                    |             |
|                                                             |            | CCCAGCAGGCTGGGGGCCGAAGAGGAG--CCCGGGCACCCCGGAGTTGGCCCCGGCCCC                               |                                                                                                                                          | 2        |       | -2bp                     |             |
|                                                             |            | CCCAGCAGGCTGGGGGCCGAAGAGGAGCGCCCGGGCACCCCGGAGTTGGCCCCGGCCCC                               |                                                                                                                                          | 1        |       | Intact / -19bp           |             |
|                                                             |            | CCCAGCAGGCTGGGGGCC-----ACCCCGGAGTTGGCCCCGGCCCC                                            | 2                                                                                                                                        |          |       | Intact                   |             |
|                                                             | Embryo 3   | CCCAGCAGGCTGGGGGCCGAAGAGGAGCGCCCGGGCACCCCGGAGTTGGCCCCGGCCCC                               | 8                                                                                                                                        |          | 8     | Intact                   |             |
|                                                             | Embryo 4   | CCCAGCAGGCTGGGGGCCGAAGAGGAGC-----CCCGGAGTTGG <b>TCCGAAGAGT</b><br><b>TGG</b> CCCCGGCCCCCA |                                                                                                                                          | 2        | 4     | -10bp, +14bp             |             |
|                                                             |            | CCCAGCAGGCTGGGGGCCGAAGAGGAGCGCCCGGGCACCCCGGAGTTGGCCCCGGCCCC                               | 2                                                                                                                                        |          |       | Intact                   |             |
|                                                             | Embryo 5   | CCCAGCAGGCTGGGGGCCGAAGAGGAGCGCCCGGGCACCCCGGAGTTGGCCCCGGCCCC                               |                                                                                                                                          | 2        | 4     | Intact / -10bp           |             |
|                                                             |            | CCCAGCAGGCTGGGG-CCGAAGAGG-----CACCCCGGAGTTGGCCCCGGCCCC                                    |                                                                                                                                          | 2        |       | -10bp                    |             |
|                                                             |            | CCCATCAGGCTGGGGGCCGAAGAGG-----CACCCCGGAGTTGGCCCCGGCCCC                                    |                                                                                                                                          | 2        |       |                          |             |
|                                                             | nuclease   | Embryo 1                                                                                  | CCCAGCAGGCTGGGGGCCGAAGAGGAGC-144bp del-TGGTGTGTTGCTGT                                                                                    |          | 5     | 8                        | -144bp      |
|                                                             |            |                                                                                           | CCCAGCAGGCTGGGGGCCGAAGAGGAGC <b>CCCACCGCCGGCCGCGACTTGCTGCTGCCCTC</b><br><b>CCCGGTGTCTGCTCTGAAGCCATTGGTCTGAAG</b> ACCCCGGAGTTGGCCCCGGCCCC |          | 2     |                          | -8bp, +65bp |
| CCCAGCAGGCTGGGGGCCGAAGAGGAG--CCCGGGCACCCCGGAGTTGGCCCCGGCCCC |            |                                                                                           |                                                                                                                                          | 1        | -2bp  |                          |             |
| Embryo 2                                                    |            | CCCAGCAGGCTGGGGGCCGAAGAGGAG-----TTGGCCCCGGCCCC                                            |                                                                                                                                          | 4        | 8     | -18bp / 13bp replacement |             |
|                                                             |            | CCCAGCAGGCTGGGGGCCGAAGAGGAGCGCCCGGGCACCCCG <b>ATGTAGGCAGCGC</b> CCCC                      | 4                                                                                                                                        |          |       | Intact                   |             |
| Embryo 3                                                    |            | CCCAGCAGGCTGGGGGCCGAAGAGGAGCG-----GGGCCCCGGCCCC                                           |                                                                                                                                          | 6        | 6     | -18bp, +1bp replacement  |             |
| Embryo 4                                                    |            | AGCAAC-----<br>CCCGGAGTTGGCCCCGGCCCC                                                      |                                                                                                                                          | 5        | 5     | -47bp                    |             |
| Embryo 5                                                    |            | CCCAGCAGGCTGGGGGCCGAAGAGGAG-----TTGGCCCCGGCCCC                                            |                                                                                                                                          | 5        | 5     | -18bp                    |             |

Underlines indicated Shk-A sgRNA sequence. Bold letters showed *Shank3* gene 1227 alanine, and red letters indicated insertion/deletion modification of the target gene.

Heterozygotic mutation sequences were filled by gray. Ins; insertion modification, Del; deletion modification.

**Supplementary Table 12. Sequence patterns of the target gene after CRISPR/mRNA or CRISPR/nuclease injection into embryos**

| Target gene   | Injected materials | No. of analyzed embryos | No. of the target gene modified embryos | No. of sequence patterns |
|---------------|--------------------|-------------------------|-----------------------------------------|--------------------------|
| <i>c-kit</i>  | mRNA               | 5                       | 5                                       | 3                        |
|               |                    |                         |                                         | 3                        |
|               |                    |                         |                                         | 2                        |
|               |                    |                         |                                         | 4                        |
|               |                    |                         |                                         | 2                        |
| <i>Shank3</i> | mRNA               | 5                       | 4                                       | 3                        |
|               |                    |                         |                                         | 4                        |
|               |                    |                         |                                         | 2                        |
|               |                    |                         |                                         | Intact                   |
|               |                    |                         |                                         | 2                        |
| <i>c-kit</i>  | nuclease           | 5                       | 5                                       | 3                        |
|               |                    |                         |                                         | 2                        |
|               |                    |                         |                                         | 2                        |
|               |                    |                         |                                         | 2                        |
|               |                    |                         |                                         | 2                        |
| <i>Shank3</i> | nuclease           | 5                       | 5                                       | 3                        |
|               |                    |                         |                                         | 2                        |
|               |                    |                         |                                         | 1                        |
|               |                    |                         |                                         | 1                        |
|               |                    |                         |                                         | 1                        |

**Supplementary Table 13. Knock-in donor oligonucleotides sequence for *c-kit* gene**

| Donor ssODN | Sequence                                                                                                               |
|-------------|------------------------------------------------------------------------------------------------------------------------|
| 36nt-S      | 5' -CTTATGATCATAAAGTGG <u>AAG</u> TTTCCCAGAAACAGGC-3'                                                                  |
| 36nt-AS     | 3' -GAATACTAGTATT <u>CACCT</u> TCAAAGGGTCTTTGTCCG-5'                                                                   |
| 100nt-S     | 5' -ATAATTATGTTTACATAGACCCAACACAACCTTCCTTATGATCATAAAGTGG <u>AAG</u> TTTCCCAGAAACAGGCTGAGTTTTGGTCAGTATGAATTCGAAACAGG-3' |
| 100nt-AS    | 3' -TATTAATACAAATGTATCTGGGTTGTGTTGAAGGAATACTAGTATT <u>CACCT</u> TCAAAGGGTCTTTGTCCGACTCAAACCAGTCATACTTAAGCTTTGTCC-5'    |

Blue letters indicated the silent mutation to avoid the re-targeting by CRISPR/Cas9. Red letters indicate the point mutations to cause the amino acid substitutions in *c-kit* gene. Underlines indicated E579K mutation of *c-kit* gene exon 11.

**Supplementary Table 14. Knock-in efficiency for *c-kit* gene in blastomere**

| Injected materials | ssODN  | Embryo   | No. of blastomere | No. of blastomere (%) |           |            | % of modified blastomere |              |      |
|--------------------|--------|----------|-------------------|-----------------------|-----------|------------|--------------------------|--------------|------|
|                    |        |          |                   | Intact                | Modified  |            |                          |              |      |
|                    |        |          |                   |                       | Indel     | precise KI |                          | imprecise KI |      |
| mRNA               | 36nt-S | 1        | 12                | 6 (50)                | 6 (50)    | 0 (0)      | 0 (0)                    | 50           |      |
|                    |        | 2        | 12                | 3 (25)                | 9 (75)    | 0 (0)      | 0 (0)                    | 75           |      |
|                    |        | 3        | 9                 | 0 (0)                 | 9 (100)   | 0 (0)      | 0 (0)                    | 100          |      |
|                    |        | 4        | 8                 | 2 (25)                | 6 (75)    | 0 (0)      | 0 (0)                    | 75           |      |
|                    |        | 5        | 8                 | 6 (75)                | 2 (25)    | 0 (0)      | 0 (0)                    | 25           |      |
|                    |        | Total    | 49                | 17 (34.7)             | 32 (65.3) | 0 (0)      | 0 (0)                    |              |      |
|                    |        | 36nt-AS  | 1                 | 9                     | 2 (22.2)  | 7 (77.8)   | 0 (0)                    | 0 (0)        | 77.8 |
|                    |        |          | 2                 | 8                     | 3 (37.5)  | 5 (62.5)   | 0 (0)                    | 0 (0)        | 62.5 |
|                    |        |          | 3                 | 8                     | 0 (0)     | 8 (100)    | 0 (0)                    | 0 (0)        | 100  |
|                    |        |          | 4                 | 7                     | 2 (28.6)  | 4 (57.1)   | 0 (0)                    | 1 (14.3) *   | 71.4 |
|                    |        |          | 5                 | 5                     | 4 (80)    | 1 (20)     | 0 (0)                    | 0 (0)        | 20   |
|                    |        | Total    | 37                | 11 (29.7)             | 25 (67.6) | 0 (0)      | 1 (2.7)                  |              |      |
|                    |        | 100nt-S  | 1                 | 8                     | 3 (37.5)  | 5 (62.5)   | 0 (0)                    | 0 (0)        | 62.5 |
|                    |        |          | 2                 | 8                     | 3 (37.5)  | 5 (62.5)   | 0 (0)                    | 0 (0)        | 62.5 |
|                    |        |          | 3                 | 7                     | 1 (14.3)  | 6 (85.7)   | 0 (0)                    | 0 (0)        | 85.7 |
|                    |        |          | 4                 | 7                     | 5 (71.4)  | 2 (28.6)   | 0 (0)                    | 0 (0)        | 28.6 |
|                    |        |          | 5                 | 6                     | 3 (50)    | 3 (50)     | 0 (0)                    | 0 (0)        | 50   |
|                    |        | Total    | 36                | 15 (41.7)             | 21 (58.3) | 0 (0)      | 0 (0)                    |              |      |
|                    |        | 100nt-AS | 1                 | 8                     | 0 (0)     | 8 (100)    | 0 (0)                    | 0 (0)        | 100  |
|                    |        |          | 2                 | 8                     | 5 (62.5)  | 3 (37.5)   | 0 (0)                    | 0 (0)        | 37.5 |
|                    | 3      |          | 8                 | 6 (75)                | 2 (25)    | 0 (0)      | 0 (0)                    | 25           |      |
|                    | 4      |          | 8                 | 7 (87.5)              | 1 (12.5)  | 0 (0)      | 0 (0)                    | 12.5         |      |
|                    | 5      |          | 7                 | 1 (14.3)              | 6 (85.7)  | 0 (0)      | 0 (0)                    | 85.7         |      |
|                    | Total  | 39       | 19 (48.7)         | 20 (51.3)             | 0 (0)     | 0 (0)      |                          |              |      |
| nuclease           | 36nt-S | 1        | 11                | 0 (0)                 | 9 (81.8)  | 0 (0)      | 2 (18.1)                 | 100          |      |
|                    |        | 2        | 8                 | 0 (0)                 | 4 (50)    | 4 (50)     | 0 (0)                    | 100          |      |
|                    |        | 3        | 7                 | 0 (0)                 | 4 (57.1)  | 3 (42.9) * | 0 (0)                    | 100          |      |
|                    |        | 4        | 6                 | 0 (0)                 | 3 (50)    | 3 (50)     | 0 (0)                    | 100          |      |
|                    |        | 5        | 6                 | 0 (0)                 | 4 (66.7)  | 2 (33.3) * | 0 (0)                    | 100          |      |
|                    |        | Total    | 38                | 0 (0)                 | 24 (63.2) | 12 (31.6)  | 2 (5.3)                  |              |      |
|                    |        | 36nt-AS  | 1                 | 11                    | 5 (45.5)  | 1 (9.1)    | 0 (0)                    | 5 (45.5) *   | 54.5 |
|                    |        |          | 2                 | 9                     | 0 (0)     | 3 (33.3)   | 0 (0)                    | 6 (66.7) *   | 100  |
|                    |        |          | 3                 | 8                     | 0 (0)     | 2 (25)     | 0 (0)                    | 6 (75) *     | 100  |
|                    |        |          | 4                 | 8                     | 0 (0)     | 8 (100)    | 0 (0)                    | 0 (0)        | 100  |
|                    |        |          | 5                 | 6                     | 0 (0)     | 3 (50)     | 3 (50)                   | 0 (0)        | 100  |
|                    |        | Total    | 42                | 5 (11.9)              | 17 (40.5) | 3 (7.1)    | 17 (40.5)                |              |      |
|                    |        | 100nt-S  | 1                 | 10                    | 10 (100)  | 0 (0)      | 0 (0)                    | 0 (0)        | 0    |
|                    |        |          | 2                 | 8                     | 7 (87.5)  | 1 (12.5)   | 0 (0)                    | 0 (0)        | 12.5 |

|          |       |    |           |          |       |       |      |
|----------|-------|----|-----------|----------|-------|-------|------|
|          | 3     | 8  | 7 (87.5)  | 1 (12.5) | 0 (0) | 0 (0) | 12.5 |
|          | 4     | 7  | 7 (100)   | 0 (0)    | 0 (0) | 0 (0) | 0    |
|          | 5     | 6  | 6 (100)   | 0 (0)    | 0 (0) | 0 (0) | 0    |
|          | Total | 39 | 37 (94.9) | 2 (5.1)  | 0 (0) | 0 (0) |      |
| 100nt-AS | 1     | 8  | 7 (87.5)  | 1 (12.5) | 0 (0) | 0 (0) | 12.5 |
|          | 2     | 8  | 8 (100)   | 0 (0)    | 0 (0) | 0 (0) | 0    |
|          | 3     | 8  | 8 (100)   | 0 (0)    | 0 (0) | 0 (0) | 0    |
|          | 4     | 6  | 4 (66.7)  | 2 (33.3) | 0 (0) | 0 (0) | 33.3 |
|          | 5     | 4  | 2 (50)    | 2 (50)   | 0 (0) | 0 (0) | 50   |
|          | Total | 34 | 29 (85.3) | 5 (14.7) | 0 (0) | 0 (0) |      |

\*Included the number of heterozygous mutations.



**Supplementary Table 15. Sequence results of c-kit gene Knock-in targeting**

| Injected materials                                           | ssODN                                                          | Embryo no.                                                    | Sequence                                                       | No. of blastomere |          |                    | Modified sequence              |
|--------------------------------------------------------------|----------------------------------------------------------------|---------------------------------------------------------------|----------------------------------------------------------------|-------------------|----------|--------------------|--------------------------------|
|                                                              |                                                                |                                                               |                                                                | Intact            | Modified | Total              |                                |
|                                                              | <i>Intact sequence</i>                                         | CCCAACACAACCTTCCTTATGATCACAAATGGGAGTTTCCCAGAAACAGGCTGAGTTTTGG |                                                                |                   |          |                    |                                |
| <i>KI sequence</i>                                           | CCCAACACAACCTTCCTTATGATCATAGTGGAGTTTCCCAGAAACAGGCTGAGTTTTGG    |                                                               |                                                                |                   |          |                    |                                |
| mRNA                                                         | 36nt-S                                                         | Embryo 1                                                      | CCCAACACAACCTTCCTTATGATCACAAATGGGAGTTTCCCAGAAACAGGCTGAATTTTTGG |                   | 4        | 12                 | Intact / +1bp                  |
|                                                              |                                                                |                                                               | CCCAACACAACCTTCCTTATGATCACAAAATGGGAGTTTCCCAGAAACAGGCTGGGTTTTGG |                   | 2        |                    | +1bp                           |
|                                                              |                                                                |                                                               | CCCAACACAACCTTCCTTATGATCACAAATGGGAGTTTCCCAGAAACAGGCTGAGTTTTGG  | 6                 |          |                    | Intact                         |
|                                                              |                                                                | Embryo 2                                                      | CCCAACACAACCTTCCTTATGATCACAAATGGGAGTTTCCCAGAAACAGGCTGAGTTTTG   |                   | 3        | 12                 | Intact / +1bp                  |
|                                                              |                                                                |                                                               | CC-AACACAACCTTCCTTATGATCACAAAATGGGAGTTTCCCAGAAACAGGCT          |                   | 4        |                    | Intact / -5bp                  |
|                                                              |                                                                |                                                               | CCCAACACAACCTTCCTTATGATCACAAA-----GTTTCCCAGAAACAGGCTGAGTTTTGG  |                   | 1        |                    | +1bp                           |
|                                                              |                                                                |                                                               | CCCAACACAACCTTCCTTATGATCACAAAATGGGAGTTTCCCAGAAACAGGCTGAGTTTTGG |                   | 1        |                    | +3bp                           |
|                                                              |                                                                |                                                               | CCCAACACAACCTTCCTTATGATCACAAATGGGAGTTTCCCAGAAACAGGCTGAGTTTTGG  | 3                 |          |                    | Intact                         |
|                                                              |                                                                | Embryo 3                                                      | CCCAACACAACCTTCCTTATGATCACAA--TGGGAGTTTCCCAGAAACAGGCTGAGTTTTGG |                   | 4        | 9                  | -2bp                           |
|                                                              |                                                                |                                                               | CCCAACACAACCTTCCTTATGATCACAAAATGGGAGTTTCCCAGAAACAGGCTGAGTTTTGG |                   | 3        |                    | +1bp                           |
|                                                              |                                                                |                                                               | CCCAACACAACCTTCCTTATGATCACAA-TGGGAGTTTCCCAGAAACAGGCTGAGTTTTGG  |                   | 2        |                    | -1bp                           |
|                                                              |                                                                | Embryo 4                                                      | CCCAACACAACCTTCCTTGTGATCACATACAAAGCTTAAGTATGACTGGTTTTGAGTCGGAC |                   | 5        | 8                  | -7bp, +44bp                    |
|                                                              | AAAGACTCTGTTTCCCAGAAACAGGCTGAGTTTTGG                           |                                                               |                                                                | 1                 | +36bp    |                    |                                |
|                                                              | CCCAACACAACCTTCCTTATGATCACATAATCATAAGGGATGTTTAAGTATGATACCAATCA |                                                               | 2                                                              |                   | Intact   |                    |                                |
|                                                              | Embryo 5                                                       | CCCAACACAACCTTCCTTATGAT---TTCGGGAGTTTCCCAGAAACAGGCTGAGTTTTGG  |                                                                | 2                 | 8        | -6bp, +3bp         |                                |
|                                                              |                                                                | CCCAACACAACCTTCCTTATGATCACAAATGGGAGTTTCCCAGAAACAGGCTGAGTTTTGG | 6                                                              |                   |          | Intact             |                                |
|                                                              | 36nt-AS                                                        | Embryo 1                                                      | CCCAACACAACCTTCCTTATGATCA--AATGGGAGTTTCCCAGAAACAGGCTGAGTTTTGG  |                   | 5        | 9                  | Intact / -2bp                  |
|                                                              |                                                                |                                                               | CCCAACACAACCTTCCTTATGATCACAAATGGGAGTTTCCCAGAAACAGGCTGAGTTTTGG  |                   | 2        |                    | +5bp                           |
|                                                              |                                                                |                                                               | CCCAACACAACCTTCCTTATGATCACAAATGGGAGTTTCCCAGAAACAGGCTGAGTTTTGG  | 2                 |          |                    | Intact                         |
|                                                              |                                                                | Embryo 2                                                      | CCCAACACAACCTTCCTTATGATCAC--ATGGGAGTTTCCCAGAAACAGGCTGAGTTTTG   |                   | 3        | 8                  | -2bp / C>A, G>A                |
|                                                              |                                                                |                                                               | CCCAACAACAACCTTCCTTATGATCACAAAATGGGAGTTTCCCAGAAACAGGCTGAGTTTT  |                   | 2        |                    | Intact / CT>TC, AA>TT          |
|                                                              |                                                                |                                                               | CCCAACACAACCTTCCTTATGATCACAAATGGGAGTTTCCCAGAAACAGGCTGAGTTTTGG  |                   | 3        |                    | Intact                         |
|                                                              |                                                                |                                                               | CC-AACACAACTCCTTATGATCACATTTATGGGAGTTTCCCAGAAACAGGCTGAGTTTTG   |                   | 2        |                    |                                |
|                                                              |                                                                | Embryo 3                                                      | CCCAACACAACCTTCCTTATGATCACAAATTTGGAAGTTTCCCAGAAACAGGCTGAGTTTT  |                   | 6        | 8                  | GG>TT, G>A / large replacement |
| CCTTGAAGTTCTCCAGAAACAGGCTGTTAAGTTTGGCTGAGTATAAGACGGAGTTTTGCA |                                                                |                                                               |                                                                | 2                 | -26bp    |                    |                                |
| TTTCACAGTA                                                   |                                                                |                                                               |                                                                |                   |          |                    |                                |
| Embryo 4                                                     |                                                                | CCCAACA-----GTTTCCCAGAAACAGGCTGAGTTTTGG                       |                                                                | 1                 | 7        | G>C / imprecise KI |                                |

|          |          |          |                                                                            |                                                         |   |        |                      |                            |
|----------|----------|----------|----------------------------------------------------------------------------|---------------------------------------------------------|---|--------|----------------------|----------------------------|
|          |          |          | CAACACAACCTTCCTTATGATCACATAGTGGAGTTTCCGAAAACAGGCTTAGTTTTGG                 |                                                         |   |        |                      |                            |
|          |          |          | CACAACCTTCCTTATGATCACAAAATGGGAGTTTCCCAGAAACAGGCTGAGTTTGG                   |                                                         | 4 |        | +2bp                 |                            |
|          |          |          | CCCAACACAACCTTCCTTATGATCACAAATGGGAGTTTCCCAGAAACAGGCTGAGTTTGG               | 2                                                       |   |        | Intact               |                            |
|          | Embryo 5 |          | CCCAACACAACCTTCCTTATGATCACAAATGGGAGTTTCCCAGAAACAGGCTGAGTTTGG               |                                                         | 1 | 5      | Intact / +1bp, AG>GA |                            |
|          |          |          | CCCAACACAACCTTCCTTATGATCACAAAATGGGAGTTTCCCAGAAACAGGCTGATTTTGG              |                                                         |   |        |                      |                            |
|          |          |          | CCCAACACAACCTTCCTTATGATCACAAATGGGAGTTTCCCAGAAACAGGCTGAGTTTGG               | 4                                                       |   |        | Intact               |                            |
| 100nt-S  | Embryo 1 |          | CCCAACACAACCTTCCTTATGATCACAAATGGGAGTTTCCCAGAAACAGGCTGAATTTTGG              |                                                         |   | 3      | 8                    | Intact / +3bp              |
|          |          |          | CCCAACACAACCTTCCTTATGATCACAAAATGGGAGTTTCCCAGAAACAGGCTGAATTT                |                                                         |   | 2      |                      | +4bp                       |
|          |          |          | CCCAACACAACCTTCCTTATGATCACAAAATGGGAGTTTCCCAGAAACAGGCTGAGTTTGG              | 3                                                       |   | Intact |                      |                            |
|          | Embryo 2 |          | CCCAACACAACCTTCCTTATG-----TTTCGGGAGTTTCCCAGAAACAGGCTGAGTTTGG               |                                                         |   | 5      | 8                    | -8bp, +4bp                 |
|          |          |          | CCCAACACAACCTTCCTTATGATCACAAATGGGAGTTTCCCAGAAACAGGCTGAGTTTGG               | 3                                                       |   |        | Intact               |                            |
|          | Embryo 3 |          | CCCAACACAACCTTCCTTATGATCACAAAATGGGAGTTTCCCAGAAACAGGCTGAGTTT                |                                                         |   | 3      | 7                    | Intact / +2bp              |
|          |          |          | CCCAACACAACCTTCCTTATGATCACAAAATGGGAGTTTCCCAGAAACAGGCTGAGTTTGG              |                                                         |   |        |                      |                            |
|          |          |          | CCCAACACAACCTTCCTTATGATCACAAAATGGGAGTTTCCCAGAAACAGGCTGAGTTT                |                                                         |   | 3      |                      | +4bp / +1bp                |
|          |          |          | CCCAACACAACCTTCCTTATGATCACAAAATGGGAGTTTCCCAGAAACAGGCTGAGTTTGG              | 1                                                       |   | Intact |                      |                            |
|          | Embryo 4 |          | CCCAACACAACCTTCCTTATGATCACATGGGATCACAAATGGGAGTTTCCCAGAAACAGGCTG            |                                                         |   | 2      | 7                    | +9bp                       |
|          |          |          | CCCAACACAACCTTCCTTATGATCACAAATGGGAGTTTCCCAGAAACAGGCTGAGTTTGG               | 5                                                       |   |        | Intact               |                            |
|          | Embryo 5 |          | CCCAACACAACCTTCCTTATGATCACAAAATGGGAGTTTCCCAGAAACAGGCTGAGTTTGG              |                                                         |   | 2      | 6                    | +1bp                       |
|          |          |          | CCCAACACAACCTTCCTTATGATCACAAATGGGAGTTTCCCAGAAACAGGCTGAGTTTGG               |                                                         |   | 1      |                      | Intact / +1bp              |
|          |          |          | CCCAACACAACCTTCCTTATGATCACAAAATGGGAGTTTCCCAGAAACAGGCTGAGTTTGG              |                                                         |   |        |                      |                            |
|          |          |          | CCCAACACAACCTTCCTTATGATCACAAATGGGAGTTTCCCAGAAACAGGCTGAGTTTGG               | 3                                                       |   | Intact |                      |                            |
|          | 100nt-AS | Embryo 1 |                                                                            | CCCAACACAACCTTCCTTATG-----GGAGTTTCCCAGAAACAGGCTGAGTTTGG |   |        | 3                    | 8                          |
|          |          |          | CCCAACACAACCTTCCTTATG-----GAGTTTCCCAGAAACAGGCTGA-TTTTGG                    |                                                         |   |        |                      |                            |
|          |          |          | CCCAACACAACCTTCCTTATGATCA-----GTTTCCCAGAAACAGGCTGAGTTTGG                   |                                                         |   | 2      | -9bp / +1bp          |                            |
|          |          |          | CCCAACACAACCTTCCTTATGATCACAAAATGGGAGTTTCCCTGAATCTTGCTGAGTTTGG              |                                                         |   | 2      | -10bp                |                            |
|          |          |          | CCCAACACAACCTTCCTTATGATCACAAAATGGGAGTTTCCCAGAAACAGGCTGAGTTTGG              |                                                         |   | 1      | 1bp                  |                            |
| Embryo 2 |          |          | CCCAACACAACCTTCCTTATGA----AATGGGAGTTTCCCAGAAACAGGCTGAGTTTGG                |                                                         |   | 3      | 8                    | -4bp                       |
|          |          |          | CCCAACACAACCTTCCTTATGATCACAAATGGGAGTTTCCCAGAAACAGGCTGAGTTTGG               | 5                                                       |   |        | Intact               |                            |
| Embryo 3 |          |          | CCCAACACAACCTTCCTTATGATCACAAAATGGGAGTTTCCCAGAAACAGGCTGAGTTTGG              |                                                         |   | 2      | 8                    | +1bp / +2bp                |
|          |          |          | CCCAACACAACCTTCCTTATGATCACACAAATGGGAGTTTCCCAGAAACAGGCTGAGTTTGG             |                                                         |   |        |                      |                            |
|          |          |          | CCCAACACAACCTTCCTTATGATCACAAATGGGAGTTTCCCAGAAACAGGCTGAGTTTGG               | 6                                                       |   |        | Intact               |                            |
| Embryo 4 |          |          | CCCAACACAACCTTCCTGGTTGTGTTCC-TGGGAGTTTCCCAGAAACAGGCTGAGTTTGG               |                                                         |   | 1      | 8                    | -12bp, +11bp               |
|          |          |          | CCCAACACAACCTTCCTTATGATCACAAATGGGAGTTTCCCAGAAACAGGCTGAGTTTGG               | 7                                                       |   |        | Intact               |                            |
| Embryo 5 |          |          | CCCAACACAACCTTCCTTATGATCACATCCCTTATGGGAGTTTCCCAGAAACAGGCTGAGTTT            |                                                         |   | 4      | 7                    | -2bp, +6bp                 |
|          |          |          | CCCAACACAACCTTCCTTATGATCACAA-TGGGAGTTTCCCAGAAACAGGCTGAGTTTGG               |                                                         |   |        |                      |                            |
|          |          |          | CCCAACACAACCTTCCTTATGATCACAAAATGGGAGTTTCCCAGAAACAGGCTGAGTTGTT<br>AGTCAGTAT |                                                         |   | 2      |                      | -2bp / +4bp,<br>-3bp, +4bp |
|          |          |          | CCCAACACAACCTTCCTTATGATCACAAATGGGAGTTTCCCAGAAACAGGCTGAGTTTGG               | 1                                                       |   |        |                      | Intact                     |
| nuclease | 36nt-S   | Embryo 1 | CCCAACACAACCTTCCTTATGATCACATAGTGGAGTTTCCCAGAAACAGGCTGAGTTTGG               |                                                         | 2 | 11     | imprecise KI         |                            |

|                                                               |                                                               |                                                                    |                                                                  |    |        |                      |                       |
|---------------------------------------------------------------|---------------------------------------------------------------|--------------------------------------------------------------------|------------------------------------------------------------------|----|--------|----------------------|-----------------------|
|                                                               |                                                               | CCCAACACAACCTTCCTTATGATCACAAAATGGGAGTTTCCCAGAAACAGGCTGAGTTTTGG     |                                                                  | 4  |        | +1bp                 |                       |
|                                                               |                                                               | CCCAACACAACCTTCCTTATGATCA--AATGGGAGTTTCCCAGAAACAGGCTGAGTTTTGG      |                                                                  | 3  |        | -2bp                 |                       |
|                                                               |                                                               | CCCAACACAACCTTCCTTATGATCACAA-TGGGAGTTTCCCAGAAACAGGCTGAGTTTTGG      |                                                                  | 2  |        | -1bp                 |                       |
| Embryo 2                                                      |                                                               | CCCAACACAACCTTCCTTATGATCATAAAGTGGAAAGTTTCCCAGAAACAGGCTGAGTTTTGG    |                                                                  | 4  | 8      | KI                   |                       |
|                                                               |                                                               | CCCAACACAACCTTCCTTATGATCACAAAATGGGAGTTTCCCAGAAACAGGCTGAGTTTTGG     |                                                                  | 4  |        | +1bp                 |                       |
| Embryo 3                                                      |                                                               | CCCAACACAACCTTCCTTATGATCATAAAGTGGAAAGTTTCCCAGAAACAGGCTGAGTTTTGG    |                                                                  | 2  | 7      | KI                   |                       |
|                                                               |                                                               | CCCAACACAACCTTCCTTATGATCACAAATGGGAGTTTCCCAGAAACAGGCTGAATTTTTGG     |                                                                  | 1  |        | Intact / KI          |                       |
|                                                               |                                                               | CCCAACACAACCTTCCTTATGATCATAAAGTGGAAAGTTTCCCAGAAACAGGCTGAGTTTTG     |                                                                  | 1  |        |                      |                       |
|                                                               |                                                               | CCCAACACAACCTTC-----CAGAAATGGGAGTTTCCCAGAAACAGGCTGAGTTTTGG         |                                                                  | 4  |        | -11bp, +3bp          |                       |
| Embryo 4                                                      |                                                               | CCCAACACAACCTTCCTTATGATCATAAAGTGGAAAGTTTCCCAGAAACAGGCTGAGTTTTGG    |                                                                  | 3  | 6      | KI                   |                       |
|                                                               |                                                               | CCCAACACAACCTTCCTTATGATCACAAAATGGGAGTTTCCCAGAAACAGGCTGAGTTTTGG     |                                                                  | 3  |        | +1bp                 |                       |
| Embryo 5                                                      |                                                               | CCCAACACAACCTTCCTTATGATCATAAAGTGGAAAGTTTCCCAGAAACAGGCTGAGTTTTGG    |                                                                  | 2  | 6      | -11bp / KI           |                       |
|                                                               |                                                               | CCCAACACAACCTTCCTTATGAT-----GTTTCCCAGAAAGAGGTTGAGTTTTGG            |                                                                  | 2  |        |                      |                       |
|                                                               |                                                               | CCCAACACAACCTTCCTTATGATCACAA-TGGGAGTTTCCCAGAAACAGGCTGAGTTTTGG      |                                                                  | 4  |        | -1bp                 |                       |
| 36nt-AS                                                       | Embryo 1                                                      | CCCAACACAACCTTCCTTATGATCAC-----CCAGAAACAGGCTGAGTTTTGG              |                                                                  | 5  | 11     | -13bp / imprecise KI |                       |
|                                                               |                                                               | CCCAACACAACCTTCCTTATGATCACATAAGTGGAAAGTTTCCCAGAAACAGGCTGAGTTTTG    |                                                                  | 1  |        | -13bp                |                       |
|                                                               |                                                               | CCCAACACAACCTTCCTTATGATCAC-----CCAGAAACAGGCTGAGTTTTGG              | 5                                                                |    |        | Intact               |                       |
|                                                               | Embryo 2                                                      |                                                                    | CCCAACACAACCTTCCTTATGATCACAAATGGGAGTTTCCCAGAAACAGGCTGAGTTTTGG    |    | 4      | 9                    | Intact / imprecise KI |
|                                                               |                                                               |                                                                    | CCCAACACAACCTTCCTTATGATCACATAAGTGGAAAGTTTCCCAGAAACAGGCTGAGTTTTG  |    | 2      |                      | A>G / imprecise KI    |
|                                                               |                                                               |                                                                    | CCCAACACAACCTTCCTTATGATCACAAAGTGGAAAGTTTCCCAGAAACAGGCTGAGTTTTGG  |    | 3      |                      | +1bp                  |
|                                                               |                                                               |                                                                    | CCCAACACAACCTTCCTTATGATCACAAAATGGGAGTTTCCCAGAAACAGGCTGAGTTTTGG   |    | 3      |                      |                       |
|                                                               | Embryo 3                                                      |                                                                    | CCCAACACAACCTTCCTTATGATCACAAATGGGAGTTTCCCAGAAACAGGCTGAGTTTTGG    |    | 6      | 8                    | Intact / imprecise KI |
|                                                               |                                                               |                                                                    | CCCAACACAACCTTCCTTATGATCATCATAGTGGAAAGTTTCCCAGAAACAGGCTGAGTTTT   |    | 2      |                      | +4bp                  |
|                                                               |                                                               |                                                                    | CCCAACACAACCTTCCTTATGATCACAAAATAAGTGGAAAGTTTCCCAGAAACAGGCTGAGTTT |    | 2      |                      |                       |
|                                                               | Embryo 4                                                      |                                                                    | CCCAACACAACCTTCCTTATG-----GGAGTTTCCCAGAAACAGGCTGAGTTTTGG         |    | 6      | 8                    | -10bp                 |
|                                                               |                                                               |                                                                    | CCCAACACAACCTTCCTTATGATCACAAAATGGGAGTTTCCCAGAAACAGGCTGAGTTTTGG   |    | 2      |                      | +1bp                  |
|                                                               | Embryo 5                                                      |                                                                    | CCCAACACAACCTTCCTTATGATCATAAAGTGGAAAGTTTCCCAGAAACAGGCTGAGTTTTGG  |    | 3      | 6                    | KI                    |
|                                                               |                                                               |                                                                    | CCCAACACAACCTTCCTTATGATCACACAATGGGAGTTTCCCAGAAACAGGCTGAGTTTTGG   |    | 3      |                      | +1bp                  |
|                                                               | 100nt-S                                                       | Embryo 1                                                           | CCCAACACAACCTTCCTTATGATCACAAATGGGAGTTTCCCAGAAACAGGCTGAGTTTTGG    | 10 |        | 10                   | Intact                |
|                                                               |                                                               | Embryo 2                                                           | CCCAACACAACCTTCCTTATGATCACAAATGGGAGTTTCCCAGAAACAGGCTGAATTTTTGG   |    | 1      | 8                    | Intact / +3bp         |
|                                                               |                                                               |                                                                    | CCCAACACAACCTTCCTTATGATCACAAAATAAGTGGGAGTTTCCCAGAAACAGGCTGAATTTT | 7  |        |                      | Intact                |
|                                                               |                                                               | Embryo 3                                                           | CCCAACACAACCTTCCTTATGATCACAAAATGGGAGTTTCCCAGAAACAGGCTGAGTTTTGG   |    | 1      | 8                    | +1bp                  |
| CCCAACACAACCTTCCTTATGATCACAAATGGGAGTTTCCCAGAAACAGGCTGAGTTTTGG |                                                               |                                                                    | 7                                                                |    | Intact |                      |                       |
| Embryo 4                                                      |                                                               | CCCAACACAACCTTCCTTATGATCACAAATGGGAGTTTCCCAGAAACAGGCTGAGTTTTGG      | 7                                                                |    | 7      | Intact               |                       |
| Embryo 5                                                      | CCCAACACAACCTTCCTTATGATCACAAATGGGAGTTTCCCAGAAACAGGCTGAGTTTTGG | 6                                                                  |                                                                  | 6  | Intact |                      |                       |
| 100nt-AS                                                      | Embryo 1                                                      | CCCACCACAACCTTCCTTATGATCACAAATGGGAGTTTCCCAGAAACAGGCTGAGTTTTG       |                                                                  | 1  | 8      | Intact / CC>AA, +1bp |                       |
|                                                               |                                                               | CCCAACAACAACCTTCCTTATGATCACAAAATAAGTGGGAGTTTCCCAGAAACAGGCTGAGTTTTG | 7                                                                |    |        | Intact               |                       |
|                                                               |                                                               | CCCAACACAACCTTCCTTATGATCACAAATGGGAGTTTCCCAGAAACAGGCTGAGTTTTGG      | 7                                                                |    |        |                      |                       |
|                                                               | Embryo 2                                                      | CCCAACACAACCTTCCTTATGATCACAAATGGGAGTTTCCCAGAAACAGGCTGAGTTTTGG      | 8                                                                |    | 8      | Intact               |                       |

|          |                                                               |   |   |   |        |
|----------|---------------------------------------------------------------|---|---|---|--------|
| Embryo 3 | CCCAACACAACCTTCCTTATGATCACAATGGGAGTTTCCCAGAAACAGGCTGAGTTTTGG  | 8 |   | 8 | Intact |
| Embryo 4 | CCCAACACAACCTTCCTTATGAT-----GGGAGTTTCCCAGAAACAGGCTGAGTTTTG    |   | 2 | 6 | -7bp   |
|          | CCCAACACAACCTTCCTTATGATCACAATGGGAGTTTCCCAGAAACAGGCTGAGTTTTGG  | 4 |   |   | Intact |
| Embryo 5 | CCCAACACA-----GTTTCCCAGAAACAGGCTGAGTTTTG                      |   | 1 | 4 | -24bp  |
|          | CCCAACACAACCTTCCTTATGATCACAAAATGGGAGTTTCCCAGAAACAGGCTGAGTTTTG |   | 1 |   | +1bp   |
|          | CCCAACACAACCTTCCTTATGATCACAATGGGAGTTTCCCAGAAACAGGCTGAGTTTTGG  | 2 |   |   | Intact |

Bold letters showed E579 at *c-kit* gene exon11 and underlines indicated W37-1 sgRNA sequence. Blue letters indicated KI mutation derived from donor ssODN, and red letters indicated insertion/deletion sequences.

Heterozygotic mutation sequences are filled by gray.

**Supplementary Table 16. Knock-in experiments for *c-kit* gene in marmoset embryos**

| Injected materials | ssODN    | Injected | Development |         |                | Analyzed | Modified (%) ** | KI (%) ** |
|--------------------|----------|----------|-------------|---------|----------------|----------|-----------------|-----------|
|                    |          |          | Dead        | 1-7cell | 8-12cell (%) * |          |                 |           |
|                    | -        | 14       | 2           | 9       | 3 (21.4)       | 3        | 3 (100)         | -         |
|                    | 36nt-S   | 32       | 5           | 11      | 16 (50)        | 13       | 12 (92.3)       | 4 (30.8)  |
| nuclease           | 36nt-AS  | 29       | 7           | 7       | 15 (51.7)      | 12       | 12 (100)        | 1 (8.3)   |
|                    | 100nt-S  | 27       | 5           | 9       | 13 (48.1)      | 10       | 2 (20)          | 0 (0)     |
|                    | 100nt-AS | 29       | 4           | 12      | 13 (44.8)      | 10       | 3 (30)          | 0 (0)     |

\*Developmental stage of *in vitro* cultured embryos at Day5 after injection, and the developmental efficiencies were calculated from the number of injected embryos.

\*\*Calculated from the number of analyzed embryos.

**Supplementary Table 17. Off-targets**

| sgRNA                   | sgRNA sequence          | Off-target sequence      | No. of mismatch | Off-target Score* | Region         |            |
|-------------------------|-------------------------|--------------------------|-----------------|-------------------|----------------|------------|
| W37-1                   | ACTTCCTTATGATCACAAATGGG | TCTTCATTATGATCACAAAAGG   | 3               | 0.522321429       | NC_013908.1    | intergenic |
|                         |                         | GATTCCTTTTGATCACAAATAGG  | 3               | 0.436363636       | NC_013908.1    | intergenic |
|                         |                         | ACATCCTTAAGATCACAAAATGG  | 3               | 0.344387755       | NC_013918.1    | intergenic |
|                         |                         | ACTTGCTTAAGATCACAAAATGG  | 3               | 0.289285714       | NC_013897.1    | intron     |
|                         |                         | ACTCTCTTATGTTACAAAATCGG  | 3               | 0.137254902       | NC_013910.1    | intergenic |
|                         |                         | ACTTGGTTATTATCACAAATAGG  | 3               | 0.115384616       | NC_013896.1    | intergenic |
|                         |                         | ACTTCCTTGTATCACACATAGG   | 3               | 0.054421769       | NC_013900.1    | intergenic |
|                         |                         | AATTCCTTATGATCACAACTGG   | 3               | 0.045454545       | NC_013897.1    | intron     |
| W37-2                   | AATGGGAGTTCCAGAAACAGG   | AATGGGAGAAACCCAGAAACAGG  | 3               | 0.596938776       | NW_003185663.1 | intergenic |
|                         |                         | TATGGGGGTTTCCAGAAATCAGG  | 3               | 0.380090497       | NC_013903.1    | intergenic |
|                         |                         | AATGGGAATCCCCAGAGACCGG   | 3               | 0.266666667       | NC_013898.1    | exon       |
|                         |                         | AGAGGGTGTTTCCAGAAACGGG   | 3               | 0.25              | NC_013907.1    | intergenic |
|                         |                         | AATGGGAGTAACCCAGAAACAGG  | 3               | 0.241071429       | NC_013905.1    | intergenic |
|                         |                         | AACAGGAGTTTCCAGAAACAGG   | 3               | 0.207692308       | NC_013909.1    | intron     |
|                         |                         | AGTGGGAGGTTCCAGAAAGCTGG  | 3               | 0.185714286       | NC_013918.1    | intron     |
|                         |                         | AATGTGAGTTTCCCAAAAAAGG   | 3               | 0.15              | NC_013905.1    | intergenic |
|                         |                         | AATGGGTGTATCCAGAAACAGG   | 3               | 0.140625          | NC_013909.1    | intron     |
|                         |                         | CATGAGAGTTTCCAGGAACCGG   | 3               | 0.131092437       | NC_013896.1    | intergenic |
|                         |                         | ATTGGGAATTTCCAGGAACGGG   | 3               | 0.128342246       | NC_013918.1    | exon       |
|                         |                         | AATGGGAGTTAGACAGAAACTGG  | 3               | 0.128205128       | NC_013915.1    | intergenic |
|                         |                         | AATGGGAGTTCTAAGATACTGG   | 3               | 0.1225            | NC_013896.1    | intergenic |
|                         |                         | AATGGGATTTTCCAAGAAGCAGG  | 3               | 0.08203125        | NC_013910.1    | intergenic |
|                         |                         | AATGTGAGTTTACAGAAATCGGG  | 3               | 0.062130178       | NC_013907.1    | exon       |
|                         |                         | AAGGGGAGTTTCCAAGAACCAGG  | 3               | 0.036206897       | NC_013902.1    | intergenic |
|                         |                         | AGTGGGAGTTTCCAGGCACTGG   | 3               | 0.026890756       | NC_013915.1    | intergenic |
| AAGGGGAGTTTCCCTGCAACAGG | 3                       | 0.017647059              | NC_013912.1     | intergenic        |                |            |
| W37-3                   | AACTCCTTATGATCACAAATGG  | ATCTTCCTTATGATCACATAAGG  | 3               | 0.318181818       | NC_013911.1    | intergenic |
|                         |                         | AACATCATTATGATCACAAATGG  | 3               | 0.232919255       | NC_013916.1    | intergenic |
|                         |                         | ATCTCCCTTATGATCACAAATGG  | 3               | 0.207792208       | NC_013901.1    | intron     |
|                         |                         | AACTTCCCTATGATCACACAGGG  | 3               | 0.134932534       | NW_003188020.1 | intron     |
|                         |                         | AACTGTCTTATGATACAAAAGG   | 3               | 0.132063492       | NC_013908.1    | intergenic |
|                         |                         | AACTTCTGATGATCACAAAGG    | 3               | 0.109491415       | NC_013901.1    | intron     |
|                         |                         | AACTCCTTAATTCACAAAGGG    | 3               | 0.086538462       | NC_013906.1    | intergenic |
|                         |                         | AACTCTTTATATCACACAAGG    | 3               | 0.064655173       | NC_013907.1    | intergenic |
|                         |                         | AACCTCCTTATGATCAGAAATAGG | 3               | 0.02283737        | NC_013897.1    | intron     |
|                         |                         | AACTTGTATGATGACAAAAGG    | 3               | 0.021848739       | NC_013900.1    | intergenic |
|                         |                         | AACTCTTTATATCAGAAAAGG    | 3               | 0.018382353       | NC_013908.1    | intergenic |
|                         |                         | AACTCCTTAAGATGAGAAAGGG   | 3               | 0.002205882       | NC_013912.1    | intergenic |
| W37-4                   | GATCATAAGGAAGTTGTGTTGGG | AATTATAAGAAGTTGTGTTAGG   | 3               | 0.462857143       | NC_013911.1    | intron     |
|                         |                         | AATCATAAGAAGTTGTATTTGG   | 3               | 0.40054945        | NC_013907.1    | intergenic |

|       |                         |                          |   |             |                |            |
|-------|-------------------------|--------------------------|---|-------------|----------------|------------|
|       |                         | GACCAAAGGAAATTGTGTTTGG   | 3 | 0.342857143 | NC_013896.1    | intergenic |
|       |                         | GACCATAGGAAGTTGTGTTGGG   | 3 | 0.293333333 | NC_013902.1    | intergenic |
|       |                         | GCTCAGAAGCAAGTTGTGTTGGG  | 3 | 0.179591837 | NC_013897.1    | intergenic |
|       |                         | GATAATAAGAAGTTGTGATTGG   | 3 | 0.154672395 | NC_013907.1    | intergenic |
|       |                         | GATCAATGGAAGTTGTGCTGGG   | 3 | 0.102463054 | NC_013896.1    | intron     |
|       |                         | AATCTTAAGGAAGTTGTGATAGG  | 3 | 0.093506494 | NC_013904.1    | intron     |
|       |                         | GATCATAAGGAAGATGTGTGTGG  | 3 | 0.087394958 | NC_013900.1    | intron     |
|       |                         | GATGAGAAGGAAGTTGTGTTGG   | 3 | 0.071428571 | NC_013900.1    | exon       |
|       |                         | GATCATAAGAAGAGGTGTTTGG   | 3 | 0.019897959 | NC_013898.1    | intergenic |
|       |                         | GATCATTAAGAAGTGGTGTGGG   | 3 | 0.0140625   | NC_013918.1    | intergenic |
| Shk-A | GGGGCCGAAGAGGAGCGCCCGG  | GGGGCCAAAGAGGAGAGCCAAAGG | 3 | 0.5         | NC_013896.1    | intergenic |
|       |                         | GAGGCCGAAAGGTGCGCCCGGG   | 3 | 0.421196581 | NC_013900.1    | intergenic |
|       |                         | GGGGCCGAGAGGTGAGCCCGGG   | 3 | 0.391111111 | NC_013901.1    | intergenic |
|       |                         | GGGGCAGAAGAGCAGAGCCCTGG  | 3 | 0.390977444 | NC_013900.1    | intron     |
|       |                         | AGGGCCGCAGAGGAGAGCCAGG   | 3 | 0.385714286 | NC_013900.1    | intergenic |
|       |                         | GGGGCTGAAGAAGAGCCCCAGG   | 3 | 0.203921569 | NC_013901.1    | intergenic |
|       |                         | GGAGCAGAAGAGGAGCCCCAGG   | 3 | 0.163865547 | NC_013896.1    | intron     |
|       |                         | GGGGCGAAGGGGAGTGCCCTGG   | 3 | 0.1         | NC_013902.1    | intergenic |
|       |                         | GGGGCAGATGAGGAGGCCCGGG   | 3 | 0.085714286 | NC_013906.1    | intergenic |
|       |                         | GGGGCCAAAGAGGAGTTCCTGG   | 3 | 0.076923077 | NC_013914.1    | intergenic |
|       |                         | GGGGAGGAAGAGGAGGCCCTGG   | 3 | 0.043956044 | NC_013909.1    | intergenic |
|       |                         | GGGGCCGAGGAGGCGCGCCCGGG  | 2 | 0.142857143 | NC_013896.1    | intergenic |
| Shk-B | GGGCTCCTGCCCCTTGCTGGTGG | GGGTCACTGCCCCTTGCTGGTGG  | 3 | 0.742857143 | NC_013900.1    | intergenic |
|       |                         | GGACTTCTGCCCATTGCTGGAGG  | 3 | 0.642857143 | NC_013902.1    | intron     |
|       |                         | AGGCTCCAGCCTGTTGCTGGTGG  | 3 | 0.387692307 | NC_013918.1    | intron     |
|       |                         | GGGCTCCGCCCCTTGCTGATGTGG | 3 | 0.325925926 | NW_003192188.1 | intergenic |
|       |                         | GGGCTACTGCAGGTTGCTGGGGG  | 3 | 0.309523809 | NC_013918.1    | intergenic |
|       |                         | GGGCTCCAGCCTGTTGCTGTGGG  | 3 | 0.301538461 | NC_013898.1    | intergenic |
|       |                         | GGGCTCCTCCCTGTTGCTGAGGG  | 3 | 0.271819526 | NC_013902.1    | intergenic |
|       |                         | GGGCTCCTCCCTGTTGCTGTGGG  | 3 | 0.20295858  | NW_003187796.1 | intergenic |
|       |                         | GGGCTACTGCCATTTGCTGGGGG  | 3 | 0.198979592 | NC_013918.1    | intergenic |
|       |                         | CGGCTCCTGCCCCTGCTGGAGG   | 3 | 0.188383046 | NC_013900.1    | intergenic |
|       |                         | GGGCTCCTGTCTGCTGCTGGCGG  | 3 | 0.14479638  | NC_013907.1    | intron     |
|       |                         | GGTGTGCTGCCCTTGCTGGGGG   | 3 | 0.125       | NW_003188042.1 | intron     |
|       |                         | GGGCTCTTGTGTTGCTGGTGG    | 3 | 0.111111111 | NC_013899.1    | intergenic |
|       |                         | GGGCTGCTGCCATTTGCTGGGGG  | 3 | 0.107142857 | NC_013913.1    | intron     |
|       |                         | GGGCTCCTCCCTGCTGCTGGGGG  | 3 | 0.082840237 | NC_013914.1    | intergenic |
|       |                         | GGGCTGCTGCCGTTGCTGGGGG   | 3 | 0.066666667 | NC_013902.1    | intergenic |
|       |                         | GGGCTGCTGCCAGTTGTGGAGG   | 3 | 0.021008403 | NC_013900.1    | intergenic |
| Shk-C | AGAGGAGCGCCCGGGCACCCCGG | AGAGCAGCACCCAGGCACCCAGG  | 3 | 0.466248038 | NC_013897.1    | intergenic |
|       |                         | AGAGGAGGCCCCAGGCACCCAGG  | 3 | 0.319526627 | NC_013902.1    | intron     |
|       |                         | AGAGGGCTCCAGGGCACCCGGG   | 3 | 0.272108843 | NC_013900.1    | intergenic |
|       |                         | GGAAGAGCGCCCGGGCACCTCGG  | 3 | 0.27        | NC_013906.1    | intergenic |

|                          |   |             |             |            |
|--------------------------|---|-------------|-------------|------------|
| AGAGCAGCCCCGGGCACACAGG   | 3 | 0.181318681 | NC_013896.1 | intergenic |
| AGAGGAGCCGACGGGCACCCGGG  | 3 | 0.157051282 | NC_013906.1 | intergenic |
| AGAGCAGCACCCCTGGCACCCAGG | 3 | 0.151530612 | NC_013904.1 | intergenic |
| TGAGGAGCGCCCGGAGACCCAGG  | 3 | 0.14479638  | NC_013913.1 | exon       |
| CGAGGAACGCCCCGGGACCCAGG  | 3 | 0.131868132 | NC_013906.1 | intergenic |
| AGAGCAGCGCCCAGGCAGCCAGG  | 3 | 0.127989657 | NC_013917.1 | exon       |
| CGAAGAGCGCCCGGGACCCAGG   | 3 | 0.118681319 | NC_013901.1 | intergenic |
| GGAGGAGCGCCCGCGCCCGGG    | 3 | 0.075630252 | NC_013896.1 | exon       |
| AGAGGAGGCCCGGGCTCTCTGG   | 3 | 0.03956044  | NC_013901.1 | intron     |
| AGAGAAGCGCCCTGGCACCGTGG  | 3 | 0.015294118 | NC_013896.1 | intron     |
| AGAGGTGCGCCCGGGCAGGCTGG  | 3 | 0.011904762 | NC_013896.1 | intergenic |
| AGAGGAGCGGCCGGGCAGGCTGG  | 3 | 0.004036909 | NC_013917.1 | intergenic |
| AGAGGAGCGCCCGGCCCGCGG    | 3 | 0.002831079 | NC_013896.1 | intron     |

\* Off-target scores are calculated by CRISPOR (Doench JG. *et al.*, 2016), and the scores greater than 0.2 are green-highlighted.

Blue letters of sgRNA sequence are PAM, and red letters indicate mismatch residue.
